# Supplementary material
Source: PubMed Central journal article supplement (PMC4151058)
Supplement: Supp_Table1-3.pdf [file Supp_Table1-3.pdf]

## Supplementary Data

SUPPLEMENTARY TABLE S1. BASELINE CHARACTERISTICS COMPARISON:  
WILDTYPE VERSUS TRANSMITTED DRUG RESISTANCE

|                                    | <i>AMU</i> (n=81)         |                     |                        |                | <i>MBA</i> (n=491)         |                      |                        |                |
|------------------------------------|---------------------------|---------------------|------------------------|----------------|----------------------------|----------------------|------------------------|----------------|
|                                    | <i>Wildtype</i><br>(n=75) | <i>TDR</i><br>(n=6) | <i>Test (2-tailed)</i> | <i>p-value</i> | <i>Wildtype</i><br>(n=476) | <i>TDR</i><br>(n=15) | <i>Test (2-tailed)</i> | <i>p-value</i> |
| Baseline VL (median)               | 6                         | 5                   | Mann–Whitney           | 0.0751         | 5                          | 5                    | Mann–Whitney           | 0.089          |
| Baseline CD4 (median)              | 64                        | 36                  | Mann–Whitney           | 0.6327         | 131                        | 159                  | Mann–Whitney           | 0.6736         |
| Age at enrollment (median)         | 36                        | 34                  | Mann–Whitney           | 0.5942         | 35                         | 28                   | Mann–Whitney           | 0.001          |
| Gender (% female)                  | 59%                       | 100%                | Fisher’s exact         | 0.0774         | 69%                        | 93%                  | Fisher’s exact         | 0.0464         |
| Subtype (% D) [“D”<br>vs. “non-D”] | 43%                       | 67%                 | Fisher’s exact         | 0.3986         | 43%                        | 53%                  | Fisher’s exact         | 0.4374         |

TDR, transmitted drug resistance.



SUPPLEMENTARY TABLE S3. BASELINE CHARACTERISTICS COMPARISON: ROWS 1–7

|                                                                 | AMU (n = 74)                         |                       |                            | MBA (n = 439)                        |                       |                            |
|-----------------------------------------------------------------|--------------------------------------|-----------------------|----------------------------|--------------------------------------|-----------------------|----------------------------|
|                                                                 | VSupp03—Yes<br>(n = 67)              | VSupp03—No<br>(n = 7) | Test (2-tailed)<br>p-value | VSupp03—Yes<br>(n = 434)             | VSupp03—No<br>(n = 5) | Test (2-tailed)<br>p-value |
| 1 Baseline VL (median)                                          | 5.561985775                          | 5.436507718           | Mann–Whitney<br>0.704      | 5.1                                  | 4.9                   | Mann–Whitney<br>0.766      |
| 2 Baseline CD4 (median)                                         | 64                                   | 17                    | Mann–Whitney<br>0.0647     | 132                                  | 196                   | Mann–Whitney<br>0.4333     |
| 3 Age at enrollment (median)                                    | 36                                   | 27                    | Mann–Whitney<br>0.0653     | 34                                   | 30                    | Mann–Whitney<br>0.0755     |
| 4 Gender (% female)                                             | 61%                                  | 86%                   | Fisher's exact<br>0.4109   | 71%                                  | 40%                   | Fisher's exact<br>0.1538   |
| 5 Subtype (% D) ["D",<br>vs. "non-D"]                           | 40%                                  | 71%                   | Fisher's exact<br>0.2276   | 42%                                  | 60%                   | Fisher's exact<br>0.6549   |
| 6 Gender: time-to-VSupp03<br>(F vs. M, median days)             | 91 (female)<br>vs. 91 (male)         | —                     | Kaplan–Meier<br>0.8013     | 86 (female)<br>vs. 84 (male)         | —                     | Kaplan–Meier<br>0.1463     |
| 7 Subtype: time-to-VSupp03<br>(A vs. D vs. non-AD, median days) | 93 (A) vs. 90 (D)<br>vs. 91 (non-AD) | —                     | Kaplan–Meier<br>0.3978     | 86 (A) vs. 85 (D)<br>vs. 85 (non-AD) | —                     | Kaplan–Meier<br>0.3267     |

Rows 1–5: Patients who achieved suppression (ever achieved viral load  $\leq 400$  copies/ml; abbreviated as “VSupp03”) versus patients who did not achieve suppression. Rows 6–7: Time to VSupp03 stratified by gender or subtype among those who achieved VSupp03.
