# Supplementary material
Source: PubMed Central journal article supplement (PMC4151058)
Supplement: Supp_Table1.pdf [file Supp_Table1.pdf]

## Supplementary Data

SUPPLEMENTARY TABLE S1. BASELINE CHARACTERISTICS COMPARISON:  
WILDTYPE VERSUS TRANSMITTED DRUG RESISTANCE

|                                    | <i>AMU (n=81)</i>          |                      |                        |                | <i>MBA (n=491)</i>          |                       |                        |                |
|------------------------------------|----------------------------|----------------------|------------------------|----------------|-----------------------------|-----------------------|------------------------|----------------|
|                                    | <i>Wildtype<br/>(n=75)</i> | <i>TDR<br/>(n=6)</i> | <i>Test (2-tailed)</i> | <i>p-value</i> | <i>Wildtype<br/>(n=476)</i> | <i>TDR<br/>(n=15)</i> | <i>Test (2-tailed)</i> | <i>p-value</i> |
| Baseline VL (median)               | 6                          | 5                    | Mann–Whitney           | 0.0751         | 5                           | 5                     | Mann–Whitney           | 0.089          |
| Baseline CD4 (median)              | 64                         | 36                   | Mann–Whitney           | 0.6327         | 131                         | 159                   | Mann–Whitney           | 0.6736         |
| Age at enrollment (median)         | 36                         | 34                   | Mann–Whitney           | 0.5942         | 35                          | 28                    | Mann–Whitney           | 0.001          |
| Gender (% female)                  | 59%                        | 100%                 | Fisher’s exact         | 0.0774         | 69%                         | 93%                   | Fisher’s exact         | 0.0464         |
| Subtype (% D) [“D”<br>vs. “non-D”] | 43%                        | 67%                  | Fisher’s exact         | 0.3986         | 43%                         | 53%                   | Fisher’s exact         | 0.4374         |

TDR, transmitted drug resistance.
