# Supplementary material
Source: PubMed Central journal article supplement (PMC4151058)
Supplement: Supp_Table2.pdf [file Supp_Table2.pdf]

SUPPLEMENTARY TABLE S2. BASELINE CHARACTERISTICS COMPARISON: SUPPRESSION

|                                    | AMU (n = 74)            |                        | MBA (n = 423)            |                        | p-value | Test (2-tailed) | p-value |
|------------------------------------|-------------------------|------------------------|--------------------------|------------------------|---------|-----------------|---------|
|                                    | VSupp01—Yes<br>(n = 63) | VSupp01—No<br>(n = 11) | VSupp01—Yes<br>(n = 404) | VSupp01—No<br>(n = 19) |         |                 |         |
| Baseline VL (median)               | 5.6                     | 5.4                    | 5.1                      | 5.0                    |         | Mann-Whitney    | 0.6183  |
| Baseline CD4 (median)              | 68                      | 19                     | 133                      | 104                    |         | Mann-Whitney    | 0.3389  |
| Age at enrollment (median)         | 36                      | 36                     | 34                       | 34                     |         | Mann-Whitney    | 0.9044  |
| Gender (% female)                  | 60%                     | 82%                    | 71%                      | 68%                    |         | Fisher's exact  | 0.8019  |
| Subtype (% D) ["D"<br>vs. "non-D"] | 41%                     | 55%                    | 42%                      | 47%                    |         | Fisher's exact  | 0.644   |

Patients who achieved suppression (as at least one viral load measurement  $\leq 400$  copies/ml within  $\leq 180$  days; abbreviated as "VSupp01") versus patients who did not achieve suppression.
